# Supplementary material for: Polysaccharides induce deep-sea Lentisphaerae strains to release chronic bacteriophages
Source: eLife. 2024 Aug 29;13:RP92345. doi: 10.7554/eLife.92345 (PMC11361711; doi:10.7554/eLife.92345)
Supplement: Supplementary file 1. — ‘Rich’ indicates strain WC36 cultivated in rich medium; ‘Lam’ indicates strain WC36 cultivated in rich medium supplemented with 10 g/l laminarin. [file elife-92345-supp1.xlsx]

## Sheet: Sheet1
Supplementary file 1. Annotations and fold-changes of the transcriptome data of Lentisphaerae strain WC36 cultured in rich medium supplemented with or without 10 g/L laminarin. “Rich” indicates strain WC36 cultivated in rich medium; “Lam” indicates strain WC36 cultivated in rich medium supplemented with 10 g/L laminarin.
Gene_id	Lam	Rich	Log2 fold change	P-value	Gene annotation
LJT99_00010	34.6613	1.9477	4.04744	0.000885	Phage tail protein
LJT99_00015	59.2497	5.0036	3.5227	4.3e-05	Phage portal protein
LJT99_00030	191.975	7.85478	4.5857	1.74e-14	Phage tail tape measure protein
LJT99_00055	69.0833	0.3268	7.23903	5.06e-07	Phage virion morphogenesis protein
LJT99_00075	39.5796	5.81831	2.7261	0.003149	Phage major capsid protein
LJT99_00080	64.1666	1.13323	5.65417	7.4e-07	Phage capsid protein
LJT99_02570	14.9831	1.39e-17	8.24245	0.040965	Phage integrase
LJT99_05290	59.2497	0.727225	6.09626	2.4e-06	Phage terminase large subunit
LJT99_05300	39.5796	0.727225	5.51189	0.00012	Phage minor capsid protein
LJT99_05340	49.4152	3.17016	3.89606	2.3e-05	Phage portal protein
LJT99_07085	49.4152	2.55892	4.19071	3.37e-05	Phage portal protein
LJT99_07095	59.2497	1.9477	4.82419	7.4e-07	Phage terminase large subunit
LJT99_07125	59.2497	3.57763	3.99131	3.68e-06	Phage integrase
LJT99_09950	64.1666	5.41097	3.52807	1.7e-05	Phage tail tape measure protein
LJT99_10035	78.9163	9.48369	3.03314	2.89e-05	Phage terminase large subunit
LJT99_14585	69.0833	26.5812	1.3665	0.040756	Phage head-tail adapter protein
LJT99_15275	44.4976	0.727225	5.68162	4.78e-05	Phage integrase
LJT99_15295	88.7488	3.78136	4.49887	9.38e-09	Phage terminase large subunit
LJT99_15305	49.4152	3.57763	3.72851	0.000117	Phage portal protein
LJT99_15310	78.9163	15.1837	2.36165	0.00034	Phage major capsid protein
LJT99_15370	24.8234	4.18879	2.51026	0.030348	Phage major tail tube protein
LJT99_01210	305.02	11.316	4.73509	1.56e-17	Type VI secretion system protein VipA
LJT99_01215	737.52	9.68729	6.23094	1.36e-28	Type VI secretion system protein EvpB
LJT99_01245	39.5796	1.9477	4.23982	4.78e-05	Type VI secretion system baseplate subunit TssK
LJT99_01250	177.229	6.63295	4.70966	2.15e-14	Type VI secretion system protein IcmF
LJT99_02010	93.6649	28.6163	1.70086	0.00488	Bacterial type II and III secretion system protein
LJT99_02015	64.1666	23.1215	1.4598	0.029185	Type II secretion system (T2SS), protein E
LJT99_02020	103.497	16.405	2.64307	2.06e-05	Type II secretion system (T2SS), protein F
LJT99_12295	15122.8	3729.38	2.01964	2.19e-06	Type II secretion system GspH family protein
LJT99_15330	54.3326	1.74398	4.84702	2.4e-06	Type VI secretion system protein
