# Supplementary material for: Polysaccharides induce deep-sea Lentisphaerae strains to release chronic bacteriophages
Source: eLife. 2024 Aug 29;13:RP92345. doi: 10.7554/eLife.92345 (PMC11361711; doi:10.7554/eLife.92345)
Supplement: Supplementary file 3. [file elife-92345-supp3.xlsx]

## Sheet: Sheet1
Supplementary file 3. Annotations of the Phage-WC36-1 and Phage-zth2-1 genome.
Genes	CDS		NR_similarity (%)	Annotation
1	27	1307	99.53	Putative zonular occludens toxin
2	1300	1494	100	Hypothetical protein
3	1498	1842	33.03	Putative minor capsid protein
4	1852	3354	99.6	Hypothetical protein
5	3456	3698	58.54	Putative major capsid protein
6	3747	3980	100	Hypothetical protein
7	3980	4366	42.72	Putative minor capsid protein
8	4366	4692	88.89	Single-stranded DNA-binding protein
9	4702	5892	100	Replication protein
