# Supplementary material for: Polysaccharides induce deep-sea Lentisphaerae strains to release chronic bacteriophages
Source: eLife. 2024 Aug 29;13:RP92345. doi: 10.7554/eLife.92345 (PMC11361711; doi:10.7554/eLife.92345)
Supplement: Supplementary file 6. [file elife-92345-supp6.xlsx]

## Sheet: Sheet1
Supplementary file 6. Accession numbers of strain WC36, strain zth2, some Planctomycetes-Verrucomicrobia-Chlamydia (PVC) group bacteria, and Bacillus cereus ATCC 14579.
Strain name	Accession number
WC36	OK614042
zth2	MW729759
Victivallis vadensis Cello	AY049713
Lentisphaera profundi SAORIC-696	KR108286
Lentisphaera araneosa HTCC2155	AY390428
Lentisphaera marina IMCC11369	JN175275
Oligosphaera ethanolica 8KG-4	AB558581
Ruficoccus amylovorans CC-MHH0563	KT751307
Cerasicoccus arenae YM26-026	AB292183
Pelagicoccus litoralis H-MN57	AB286017
Opitutus terrae PB90-3	AJ229239
Verrucomicrobium spinosum DSM4136	X90515
Chlamydia avium 10DC88	CP006571
Chlamydia pecorum E58	CP002608
Chlamydia gallinacea 08-1274/3	GQ398026
Candidatus Kuenenia stuttgartiensis	LT934425
Candidatus Brocadia anammoxidans	KU217720
Poriferisphaera corsica KS4	MK559978
Tepidisphaera mucosa 2842	KM036168
Algisphaera agarilytica 06SJR6-2	AB845176
Phycisphaera mikurensis NBRC 102666	AP012338
Pirellula staleyi DSM 6068	CP001848
Crateriforma conspicua Mal65	MK559980
Bremerella volcania Pan97	MK554518
Bacillus cereus ATCC 14579	AE016877
